# Supplementary material
Source: PubMed Central journal article supplement (PMC5571262)
Supplement: JVI.00767-17_zjv999182881s2.pdf [file JVI.00767-17_zjv999182881s2.pdf]

Legend of Supplemental movie s1

**Movie s1: Live imaging of A4-mCherry expression in BSC40 and BMDM cells infected with WT-WR and WR $\Delta$ A26 viruses.**

Fluorescent expression of A4-mCherry protein from the viral late promoter was recorded every 15 minutes with live-imaging analysis using Zeiss LSM510 META-NLO confocal microscopy from 1-21 hours p.i..
